# Supplementary material for: Associations in cell type-specific hydroxymethylation and transcriptional alterations of pediatric central nervous system tumors
Source: PubMed Central journal article supplement (PMC11061294; doi:10.1038/s41467-024-47943-9), 2024-04-30
Supplement: 41467_2024_47943_MOESM3_ESM.pdf [file 41467_2024_47943_MOESM3_ESM.pdf]

## Description of Additional Supplementary Files

**Supplementary Data 1.** Statistically significant results from epigenome wide association study comparing astrocytoma to non-tumor tissue in the unadjusted model.

**Supplementary Data 2.** Statistically significant results from epigenome wide association study comparing astrocytoma to non-tumor tissue in the adjusted model including all five cell types.

**Supplementary Data 3.** Statistically significant results from epigenome wide association study comparing embryonal tumors to non-tumor tissue in the unadjusted model.

**Supplementary Data 4.** Statistically significant results from epigenome wide association study comparing embryonal tumors to non-tumor tissue in the adjusted model including all five cell types.

**Supplementary Data 5.** Statistically significant results from epigenome wide association study comparing ependymoma to non-tumor tissue in the unadjusted model.

**Supplementary Data 6.** Statistically significant results from epigenome wide association study comparing ependymoma to non-tumor tissue in the adjusted model including all five cell types.

**Supplementary Data 7.** Statistically significant results from epigenome wide association study comparing glioneuronal/neuronal tumors to non-tumor tissue in the unadjusted model.

**Supplementary Data 8.** Statistically significant results from epigenome wide association study comparing glioneuronal/neuronal tumors to non-tumor tissue in the adjusted model including all five cell types.

**Supplementary Data 9.** Results from differential gene expression analysis comparing astrocytoma to non-tumor brain tissue in the unadjusted model.

**Supplementary Data 10.** Results from differential gene expression analysis comparing astrocytoma to non-tumor brain tissue in the adjusted for cell type proportions and tumor purity.

**Supplementary Data 11.** Results from differential gene expression analysis comparing embryonal tumors to non-tumor brain tissue in the unadjusted model.

**Supplementary Data 12.** Results from differential gene expression analysis comparing embryonal tumors to non-tumor brain tissue in the adjusted for cell type proportions and tumor purity.

**Supplementary Data 13.** Results from differential gene expression analysis comparing ependymoma to non-tumor brain tissue in the unadjusted model.

**Supplementary Data 14.** Results from differential gene expression analysis comparing ependymoma to non-tumor brain tissue in the adjusted for cell type proportions and tumor purity.

**Supplementary Data 15.** Results from differential gene expression analysis comparing glioneuronal/neuronal tumors to non-tumor brain tissue in the unadjusted model.

**Supplementary Data 16.** Results from differential gene expression analysis comparing glioneuronal/neuronal tumors to non-tumor brain tissue in the adjusted for cell type proportions and tumor purity.

**Supplementary Data 17.** Results from cell type proportion adjusted epigenome wide association study with CellDMC comparing astrocytoma to non-tumor brain tissue.

**Supplementary Data 18.** Results from cell type proportion adjusted epigenome wide association study with CellDMC comparing embryonal tumors to non-tumor brain tissue.

**Supplementary Data 19.** Results from cell type proportion adjusted epigenome wide association study with CellDMC comparing ependymoma to non-tumor brain tissue.

**Supplementary Data 20.** Results from cell type proportion adjusted epigenome wide association study with CellDMC comparing glioneuronal/neuronal tumors to non-tumor brain tissue.

**Supplementary Data 21.** Cell type-driven dhmcpgs and dmcpGs enrichment at genomic contexts. Odds ratio and 95% confidence intervals calculated by the Mantel-Haenszel test.
