# Supplementary material for: Associations in cell type-specific hydroxymethylation and transcriptional alterations of pediatric central nervous system tumors
Source: PubMed Central journal article supplement (PMC11061294; doi:10.1038/s41467-024-47943-9), 2024-04-30
Supplement: 41467_2024_47943_MOESM5_ESM.pdf [file 41467_2024_47943_MOESM5_ESM.pdf]

## Reporting Summary

Nature Portfolio wishes to improve the reproducibility of the work that we publish. This form provides structure for consistency and transparency in reporting. For further information on Nature Portfolio policies, see our [Editorial Policies](#) and the [Editorial Policy Checklist](#).

### Statistics

For all statistical analyses, confirm that the following items are present in the figure legend, table legend, main text, or Methods section.

n/a | Confirmed

- The exact sample size ( $n$ ) for each experimental group/condition, given as a discrete number and unit of measurement
- A statement on whether measurements were taken from distinct samples or whether the same sample was measured repeatedly
- The statistical test(s) used AND whether they are one- or two-sided  
*Only common tests should be described solely by name; describe more complex techniques in the Methods section.*
- A description of all covariates tested
- A description of any assumptions or corrections, such as tests of normality and adjustment for multiple comparisons
- A full description of the statistical parameters including central tendency (e.g. means) or other basic estimates (e.g. regression coefficient) AND variation (e.g. standard deviation) or associated estimates of uncertainty (e.g. confidence intervals)
- For null hypothesis testing, the test statistic (e.g.  $F$ ,  $t$ ,  $r$ ) with confidence intervals, effect sizes, degrees of freedom and  $P$  value noted  
*Give  $P$  values as exact values whenever suitable.*
- For Bayesian analysis, information on the choice of priors and Markov chain Monte Carlo settings
- For hierarchical and complex designs, identification of the appropriate level for tests and full reporting of outcomes
- Estimates of effect sizes (e.g. Cohen's  $d$ , Pearson's  $r$ ), indicating how they were calculated

*Our web collection on [statistics for biologists](#) contains articles on many of the points above.*

### Software and code

Policy information about [availability of computer code](#)

|                 |                                                                                                                                                                                                                                                                                                                                                                                                                                                                                                                                                                               |
|-----------------|-------------------------------------------------------------------------------------------------------------------------------------------------------------------------------------------------------------------------------------------------------------------------------------------------------------------------------------------------------------------------------------------------------------------------------------------------------------------------------------------------------------------------------------------------------------------------------|
| Data collection | <input type="text" value="No software or code was used to collect data."/>                                                                                                                                                                                                                                                                                                                                                                                                                                                                                                    |
| Data analysis   | <input type="text" value="Code used for analysis is available at https://github.com/sarahmlee/IntegrativePCNS and https://github.com/AlexsLemonade/alsf-scpca/tree/main/workflows/genetic-demux. The following software were used for data analysis:&lt;br/&gt;- 10X Cell Ranger&lt;br/&gt;- STAR (v2.7.7a); STARsolo; bcftools; cellsnp-lite; FastQC (v0.11.8); cutadapt (v2.4); picard (v2.18.29); HTseq (v0.11.2)&lt;br/&gt;- R packages: Seurat (v4); SeSAMe (v1); InfiniumPurify (v1.3.1); limma (v3.54.2); EpiDISH (v2.14.1); DESeq2 (v1.36.0); ReactomePA (v1.40.0)"/> |

For manuscripts utilizing custom algorithms or software that are central to the research but not yet described in published literature, software must be made available to editors and reviewers. We strongly encourage code deposition in a community repository (e.g. GitHub). See the Nature Portfolio [guidelines for submitting code & software](#) for further information.

## Data

Policy information about [availability of data](#)

All manuscripts must include a [data availability statement](#). This statement should provide the following information, where applicable:

- Accession codes, unique identifiers, or web links for publicly available datasets
- A description of any restrictions on data availability
- For clinical datasets or third party data, please ensure that the statement adheres to our [policy](#)

The raw single nuclei-RNA seq data and the processed data for single nuclei-RNA seq generated in this study are available in the Gene Expression Omnibus under accession code GSE211362 [<https://www.ncbi.nlm.nih.gov/geo/query/acc.cgi?acc=GSE211362>]. The raw hydroxymethylation/methylation data generated in this study have been deposited in the Gene Expression Omnibus under accession code GSE152561 [<https://www.ncbi.nlm.nih.gov/geo/query/acc.cgi?acc=GSE152561>]. The raw bulk RNA-seq data generated in this study have been deposited in the Gene Expression Omnibus under accession code GSE241396 [<https://www.ncbi.nlm.nih.gov/geo/query/acc.cgi?acc=GSE241396>]. All supplementary tables and source data are available at [https://figshare.com/projects/Associations\\_in\\_cell\\_type-specific\\_hydroxymethylation\\_and\\_transcriptional\\_alterations\\_of\\_pediatric\\_central\\_nervous\\_system\\_tumors/193781](https://figshare.com/projects/Associations_in_cell_type-specific_hydroxymethylation_and_transcriptional_alterations_of_pediatric_central_nervous_system_tumors/193781). GRCH38 reference data are available in the National Library of Medicine database ([https://www.ncbi.nlm.nih.gov/datasets/genome/GCF\\_000001405.26/](https://www.ncbi.nlm.nih.gov/datasets/genome/GCF_000001405.26/)).

## Research involving human participants, their data, or biological material

Policy information about studies with [human participants or human data](#). See also policy information about [sex, gender \(identity/presentation\), and sexual orientation](#) and [race, ethnicity and racism](#).

|                                                                    |                                                                                                                                                                                                                                                                                                                              |
|--------------------------------------------------------------------|------------------------------------------------------------------------------------------------------------------------------------------------------------------------------------------------------------------------------------------------------------------------------------------------------------------------------|
| Reporting on sex and gender                                        | Sex of each subject were collected from the clinical information during the patient's diagnosis and surgery. While sex-specific traits were not investigated, it was included to be adjusted for in the regression models.                                                                                                   |
| Reporting on race, ethnicity, or other socially relevant groupings | No race, ethnicity, or other socially relevant grouping information were collected on the subject.                                                                                                                                                                                                                           |
| Population characteristics                                         | The study cohort were under 18 years of age as they needed to have CNS tumors during childhood. There were 8 astrocytoma, 6 embryonal tumors, 10 ependymoma, and 8 glioneuronal/neuronal tumors included in the study. The cohort was comprised of 41% female subjects and 59% male subjects.                                |
| Recruitment                                                        | The subjects were recruited retrospectively based on the availability of pediatric CNS tumors that were available as frozen tissue at Dartmouth Hitchcock Medical Center.                                                                                                                                                    |
| Ethics oversight                                                   | This study complies with all Dartmouth Hitchcock Medical Center Institutional Review Board regulations. This study was approved by the Dartmouth Hitchcock Medical Center Institutional Review Board Study #00030211. Parents/legal guardians of the subjects provided consent for the use of tissues for research purposes. |

Note that full information on the approval of the study protocol must also be provided in the manuscript.

## Field-specific reporting

Please select the one below that is the best fit for your research. If you are not sure, read the appropriate sections before making your selection.

- Life sciences       Behavioural & social sciences       Ecological, evolutionary & environmental sciences

For a reference copy of the document with all sections, see [nature.com/documents/nr-reporting-summary-flat.pdf](https://www.nature.com/documents/nr-reporting-summary-flat.pdf)

## Life sciences study design

All studies must disclose on these points even when the disclosure is negative.

|                 |                                                                                                                                                                                                                                         |
|-----------------|-----------------------------------------------------------------------------------------------------------------------------------------------------------------------------------------------------------------------------------------|
| Sample size     | Sample size was determined based on the availability of frozen pediatric CNS tumors available at Dartmouth Hitchcock Medical Center.                                                                                                    |
| Data exclusions | Samples with both DNA methylation, hydroxymethylation, single and bulk RNA-seq were included in the analysis. One sample with exceedingly high duplicate read percentage was removed from downstream analysis to preserve data quality. |
| Replication     | Due to the extremely small size of the frozen human tissue available, only one replicate per sample were obtained.                                                                                                                      |
| Randomization   | The subjects could not be randomized as the samples were collected retrospectively and not at initial diagnosis.                                                                                                                        |
| Blinding        | We could not apply blinding as we needed to confirm the diagnosis of the subjects in order to include the subjects in the study as having pediatric CNS tumors or being a pediatric control for which brain tissue were available.      |

# Reporting for specific materials, systems and methods

We require information from authors about some types of materials, experimental systems and methods used in many studies. Here, indicate whether each material, system or method listed is relevant to your study. If you are not sure if a list item applies to your research, read the appropriate section before selecting a response.

## Materials & experimental systems

- | n/a                                 | Involvement in the study                               |
|-------------------------------------|--------------------------------------------------------|
| <input checked="" type="checkbox"/> | <input type="checkbox"/> Antibodies                    |
| <input checked="" type="checkbox"/> | <input type="checkbox"/> Eukaryotic cell lines         |
| <input checked="" type="checkbox"/> | <input type="checkbox"/> Palaeontology and archaeology |
| <input checked="" type="checkbox"/> | <input type="checkbox"/> Animals and other organisms   |
| <input checked="" type="checkbox"/> | <input type="checkbox"/> Clinical data                 |
| <input checked="" type="checkbox"/> | <input type="checkbox"/> Dual use research of concern  |
| <input checked="" type="checkbox"/> | <input type="checkbox"/> Plants                        |

## Methods

- | n/a                                 | Involvement in the study                        |
|-------------------------------------|-------------------------------------------------|
| <input checked="" type="checkbox"/> | <input type="checkbox"/> ChIP-seq               |
| <input checked="" type="checkbox"/> | <input type="checkbox"/> Flow cytometry         |
| <input checked="" type="checkbox"/> | <input type="checkbox"/> MRI-based neuroimaging |

## Plants

### Seed stocks

Report on the source of all seed stocks or other plant material used. If applicable, state the seed stock centre and catalogue number. If plant specimens were collected from the field, describe the collection location, date and sampling procedures.

### Novel plant genotypes

Describe the methods by which all novel plant genotypes were produced. This includes those generated by transgenic approaches, gene editing, chemical/radiation-based mutagenesis and hybridization. For transgenic lines, describe the transformation method, the number of independent lines analyzed and the generation upon which experiments were performed. For gene-edited lines, describe the editor used, the endogenous sequence targeted for editing, the targeting guide RNA sequence (if applicable) and how the editor was applied.

### Authentication

Describe any authentication procedures for each seed stock used or novel genotype generated. Describe any experiments used to assess the effect of a mutation and, where applicable, how potential secondary effects (e.g. second site T-DNA insertions, mosaicism, off-target gene editing) were examined.
